# Supplementary material
Source: PubMed Central journal article supplement (PMC3463496)
Supplement: gmic-3-383-s01.pdf [file gmic-3-383-s01.pdf]

## **Supplemental Material to:**

**Patrick D. Schloss, Alyxandria M. Schubert, Joseph P.  
Zackular, Kathryn D.**

**Iverson, Vincent B. Young, and Joseph F. Petrosino**

**Stabilization of the murine  
gut microbiome following weaning**

**Gut Microbes 2012; 3(4)**

**<http://dx.doi.org/10.4161/gmic.21008>**

**[http://www.landesbioscience.com/journals/gutmicrobes/  
article/21008/](http://www.landesbioscience.com/journals/gutmicrobes/article/21008/)**

## Supplementary videos

**Video 1. Animated NMDS plot of all fecal samples together in the same ordination.** The 180 sec animation rotates along all three axes. The stress for this representation was 0.15. Samples collected between 0 and 9 dpw are in blue, those from 11 to 140 dpw are in green, those from 141-150 dpw are in red, and samples from 364 dpw are in black.

**Video 2. Animated NMDS plot of all fecal samples from Female 3 in the same ordination space as was used in Video 1.** The stress for this representation was 0.15. Samples collected between 0 and 9 dpw are in blue, those from 11 to 140 dpw are in green, those from 141-150 dpw are in red, and samples from 364 dpw are in black.

**Video 3. Animated NMDS plot of all fecal samples from Female 4 in the same ordination space as was used in Video 1.** The stress for this representation was 0.15. Samples collected between 0 and 9 dpw are in blue, those from 11 to 140 dpw are in green, and those from 141-150 dpw are in red.

**Video 4. Animated NMDS plot of all fecal samples from Female 5 in the same ordination space as was used in Video 1.** The stress for this representation was 0.15. Samples collected between 0 and 9 dpw are in blue, those from 11 to 140 dpw are in green, and those from 141-150 dpw are in red.

**Video 5. Animated NMDS plot of all fecal samples from Female 6 in the same ordination space as was used in Video 1.** The stress for this representation was 0.15. Samples collected between 0 and 9 dpw are in blue, those from 11 to 140 dpw are in green, and those from 141-150 dpw are in red.

**Video 6. Animated NMDS plot of all fecal samples from Female 7 in the same ordination space as was used in Video 1.** The stress for this representation was 0.15.

Samples collected between 0 and 9 dpw are in blue, those from 11 to 140 dpw are in green, and those from 141-150 dpw are in red.

**Video 7. Animated NMDS plot of all fecal samples from Female 8 in the same ordination space as was used in Video 1.** The stress for this representation was 0.15.

Samples collected between 0 and 9 dpw are in blue, those from 11 to 140 dpw are in green, and those from 141-150 dpw are in red.

**Video 8. Animated NMDS plot of all fecal samples from Male 1 in the same ordination space as was used in Video 1.** The stress for this representation was 0.15.

Samples collected between 0 and 9 dpw are in blue, those from 11 to 140 dpw are in green, those from 141-150 dpw are in red, and samples from 364 dpw are in black.

**Video 9. Animated NMDS plot of all fecal samples from Male 2 in the same ordination space as was used in Video 1.** The stress for this representation was 0.15.

Samples collected between 0 and 9 dpw are in blue, those from 11 to 140 dpw are in green, those from 141-150 dpw are in red, and samples from 364 dpw are in black.

**Video 10. Animated NMDS plot of all fecal samples from Male 3 in the same ordination space as was used in Video 1.** The stress for this representation was 0.15.

Samples collected between 0 and 9 dpw are in blue, those from 11 to 140 dpw are in green, and those from 141-150 dpw are in red.

**Video 11. Animated NMDS plot of all fecal samples from Male 4 in the same ordination space as was used in Video 1.** The stress for this representation was 0.15.

Samples collected between 0 and 9 dpw are in blue, those from 11 to 140 dpw are in green, and those from 141-150 dpw are in red.

**Video 12. Animated NMDS plot of all fecal samples from Male 5 in the same ordination space as was used in Video 1.** The stress for this representation was 0.15.

Samples collected between 0 and 9 dpw are in blue, those from 11 to 140 dpw are in green, and those from 141-150 dpw are in red.

**Video 13. Animated NMDS plot of all fecal samples from Male 6 in the same ordination space as was used in Video 1.** The stress for this representation was 0.15.

Samples collected between 0 and 9 dpw are in blue, those from 11 to 140 dpw are in green, and those from 141-150 dpw are in red.
